# Supplementary material for: Evidence for Critical Role of Lymphocyte Cytosolic Protein 1 in Oral Cancer
Source: PubMed Central journal article supplement (PMC5322526; doi:10.1038/srep43379), 2017-02-23
Supplement: srep43379-s1.pdf [file srep43379-s1.pdf]

## **Supplementary Information**

### **Evidence for Critical Role of Lymphocyte Cytosolic Protein 1 in Oral Cancer**

Nao Koide<sup>1</sup>, Atsushi Kasamatsu<sup>2</sup>, Yosuke Endo-Sakamoto<sup>2</sup>, Sho Ishida<sup>1</sup>, Toshihiro Shimizu<sup>3</sup>, Yasushi Kimura<sup>4</sup>, Isao Miyamoto<sup>5</sup>, Shusaku Yoshimura<sup>1</sup>, Masashi Shiiba<sup>6</sup>, Hideki Tanzawa<sup>1,2</sup>, & Katsuhiko Uzawa<sup>1,2</sup>

<sup>1</sup>Department of Oral Science, Graduate School of Medicine, Chiba University, Chiba, Japan

<sup>2</sup>Department of Dentistry and Oral-Maxillofacial Surgery, Chiba University Hospital, Chiba, Japan

<sup>3</sup>Department of Oral Surgery, Kashima Rosai Hospital, Ibaraki, Japan

<sup>4</sup>Department of Oral and maxillofacial Surgery Research Institute, National Defense Medical College, Saitama, Japan

<sup>5</sup>Department of Dentistry and Oral-Maxillofacial Surgery, Japanese Red Cross Fukaya Hospital, Saitama, Japan

<sup>6</sup>Department of Clinical Oncology, Graduate School of Medicine, Chiba University, Chiba, Japan

\*Corresponding Authors:

A. Kasamatsu and K. Uzawa, Department of Oral Science, Graduate School of Medicine, Chiba University, 1-8-1 Inohana, Chuo-ku, Chiba 260-8670, Japan

E-mails: kasamatsua@faculty.chiba-u.jp; uzawak@faculty.chiba-u.jp

Supplemental Fig. S1

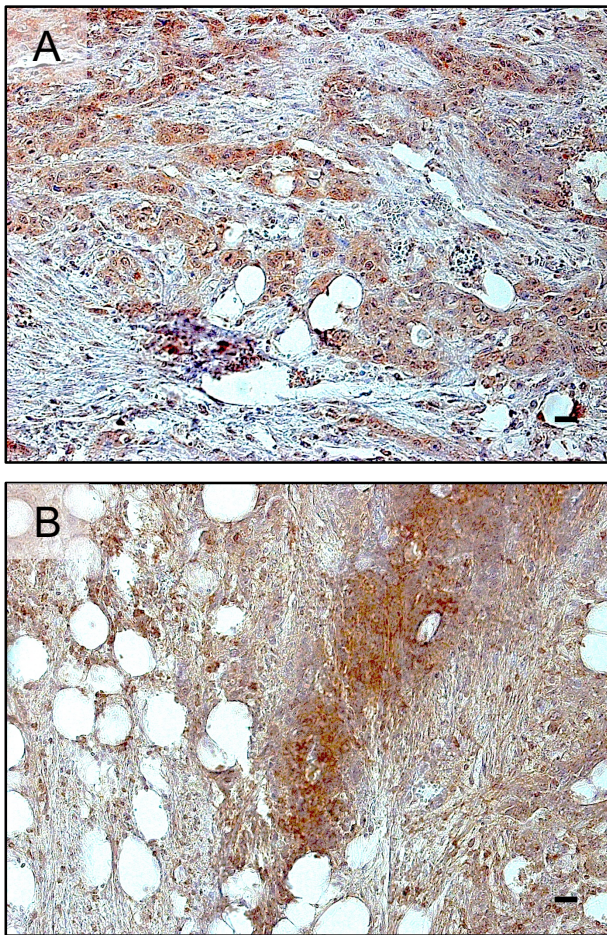

**Supplemental Figure S1.** Representative results of IHC for LCP1 (A) and F-actin (B).

Note that the cancer cells at the invasive front reveal strong immunoreaction for both LCP1 and F-actin. Original magnification, x 200. Scale bars, 50  $\mu$ m.
